# Supplementary material for: Tuning the ferrous coordination structure enables a highly reversible Fe anode for long-life all-iron flow batteries
Source: Royal Society of Chemistry journal article supplement (doi:10.1039/d1ta07295a), 2021-01-01
Supplement: d1ta07295a1.pdf [file d1ta07295a1.pdf]

Supplementary Information

# Tuning Ferrous Coordination Structure Enables a Highly Reversible Fe Anode for Long-life All-iron Flow Batteries

Yuxi Song,<sup>a,b</sup> Kaiyue Zhang,<sup>a</sup> Xiangrong Li,<sup>a</sup> Chuanwei Yan,<sup>a</sup> Qinghua Liu,<sup>c\*</sup> Ao Tang,<sup>a\*</sup>

<sup>a</sup> Institute of Metal Research, Chinese Academy of Sciences, Shenyang, China

<sup>b</sup> School of Material Science and Engineering, University of Science and Technology of China, Shenyang, China.

<sup>c</sup> National Institute of Clean-and-Low-Carbon Energy, Beijing, China

\*Corresponding author:

Ao Tang Email: a.tang@imr.ac.cn

Qinghua Liu Email: liuqinghua@chnenergy.com.cn

Tel: +86-024-81083919 Fax: +86-024-23998320

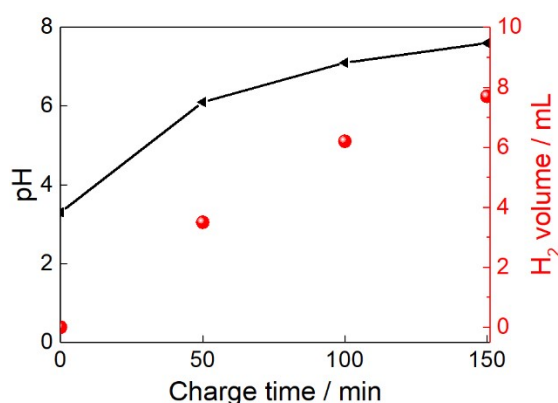

Fig. S1. The relationship between pH variation and H<sub>2</sub> evolution during charging.  
Note: Measurements of pH and H<sub>2</sub> collection were taken in a three-electrode system.

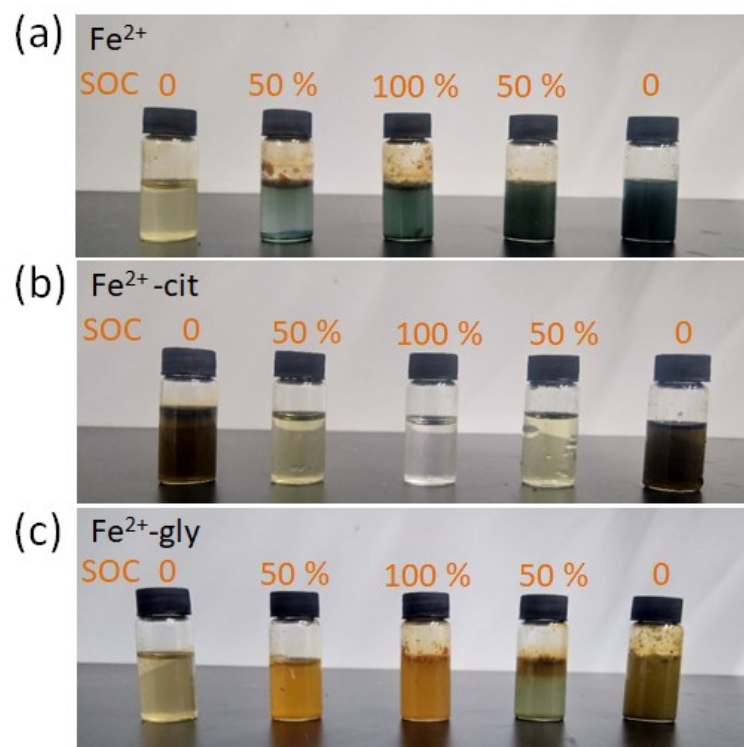

Fig. S2. The photos of (a)  $\text{FeCl}_2$ , (b)  $\text{Fe}^{2+}$ -cit and (c)  $\text{Fe}^{2+}$ -gly at different SOC in the charge-discharge tests.

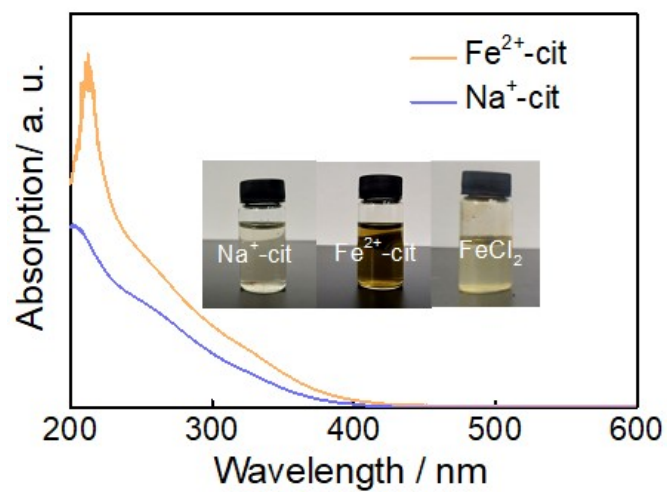

Fig. S3. The UV-vis spectrum of  $\text{Fe}^{2+}$ -cit and  $\text{Na}^+$ -cit. Inset: photos of  $\text{Na}^+$ -cit,  $\text{Fe}^{2+}$ -cit and  $\text{FeCl}_2$ .

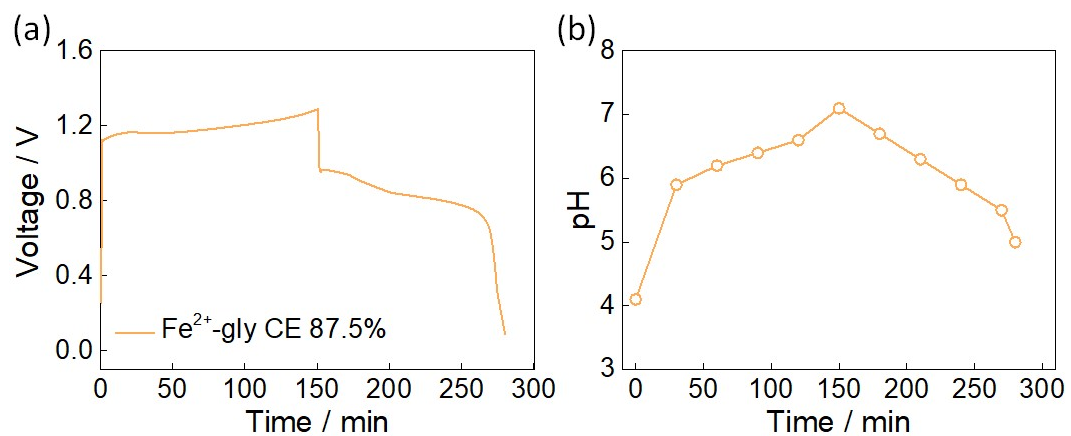

Fig. S4. (a) A complete charge-discharge cycle of the full cell adopting  $\text{Fe}^{2+}$ -gly anolyte; (b) the corresponding pH variation of the  $\text{Fe}^{2+}$ -gly anolyte during charge-discharge cycle.

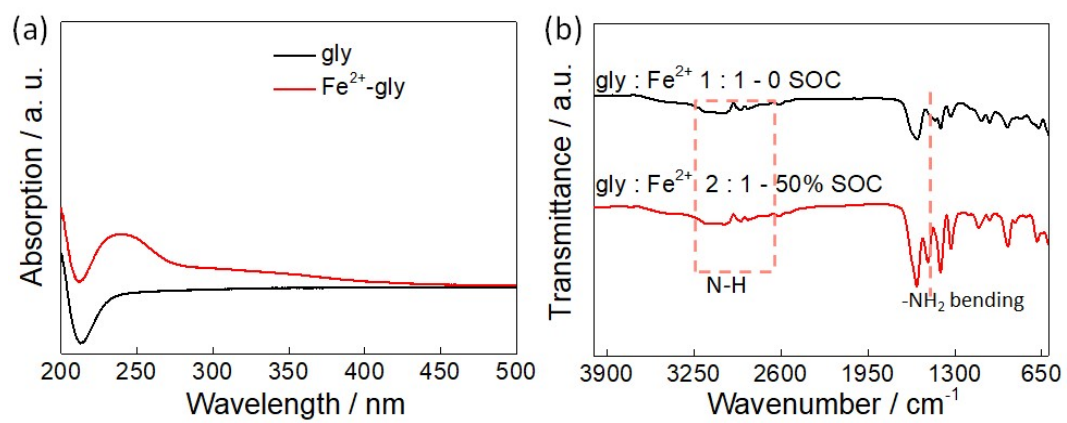

Fig. S5. (a) UV-vis spectrum of glycine and Fe<sup>2+</sup>-gly; (b) FTIR of Fe<sup>2+</sup>-gly at 0 and 50% SOC.

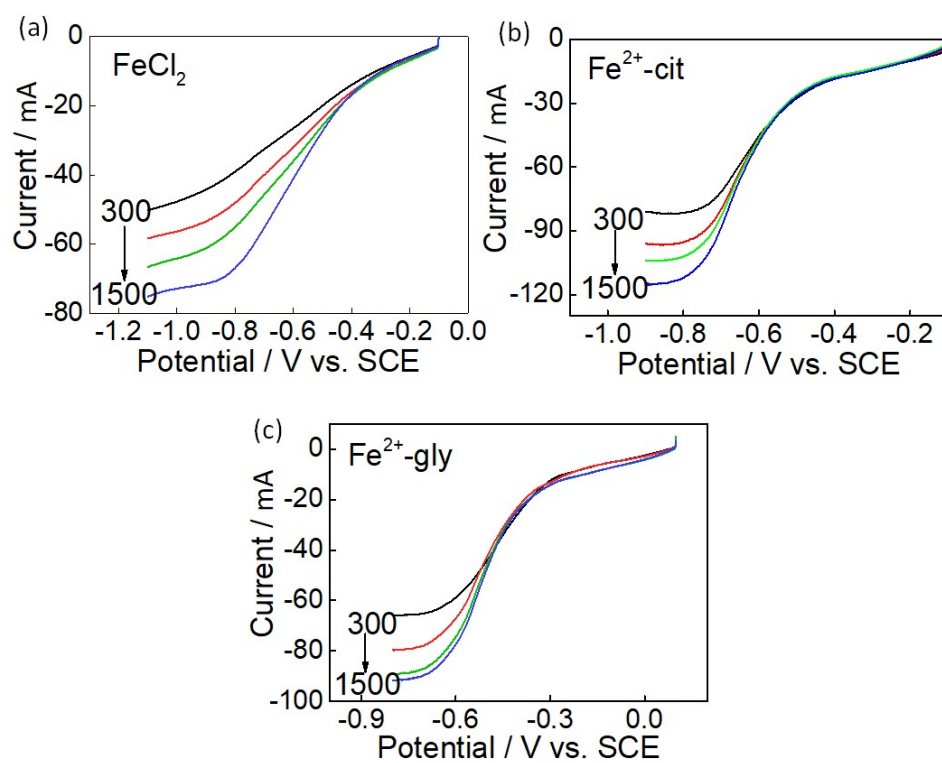

Fig. S6. RDE study of the reduction of (a)  $\text{FeCl}_2$  (b)  $\text{Fe}^{2+}$ -cit and (c)  $\text{Fe}^{2+}$ -gly.

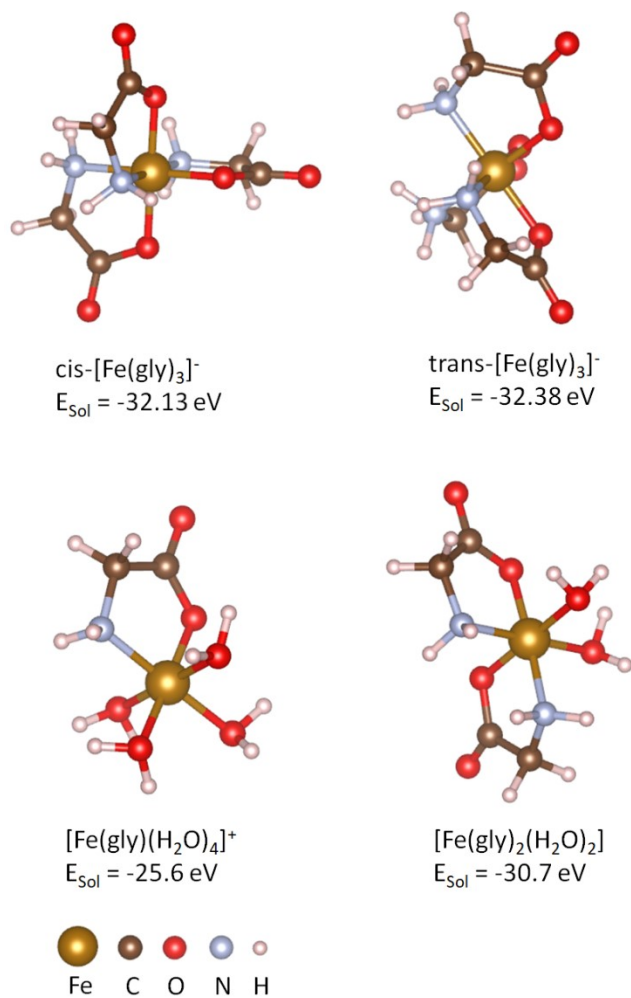

Fig. S7. The calculated solvation energy of various  $\text{Fe}^{2+}$  solvation structures.

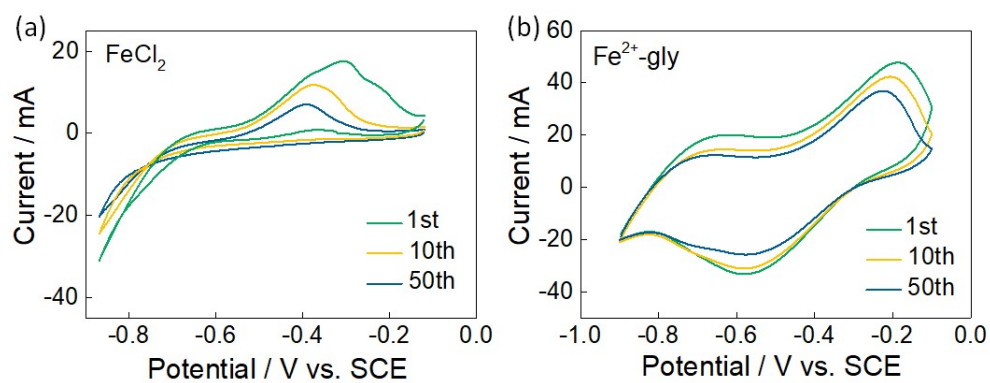

Fig. S8. The long-term CV test for (a) FeCl<sub>2</sub> and (b) Fe<sup>2+</sup>-gly at the scanning rate of 5 mV s<sup>-1</sup> vs. SCE.

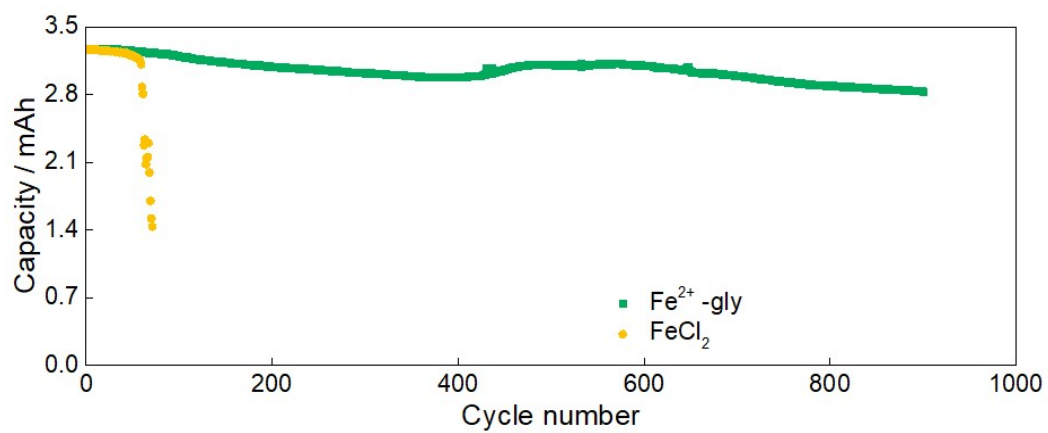

Fig. S9. The long-term stability tests of symmetrical cell using FeCl<sub>2</sub> and Fe<sup>2+</sup>-gly after 900 cycles.

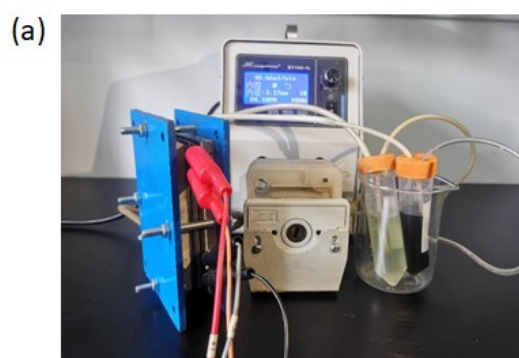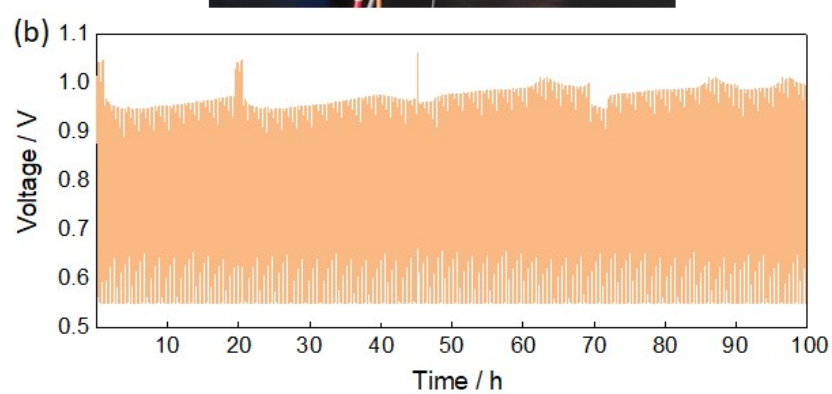

Fig. S10. (a) All-iron flow battery setup for charge-discharge tests and (b) voltage profiles.

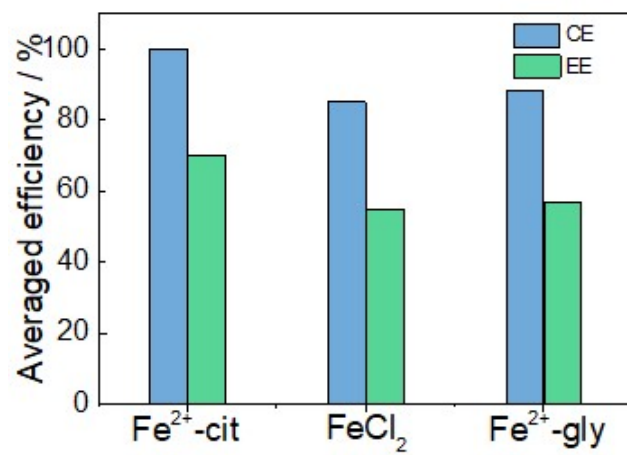

Fig. S11. The averaged CE and EE of full cell adopting different analytes.

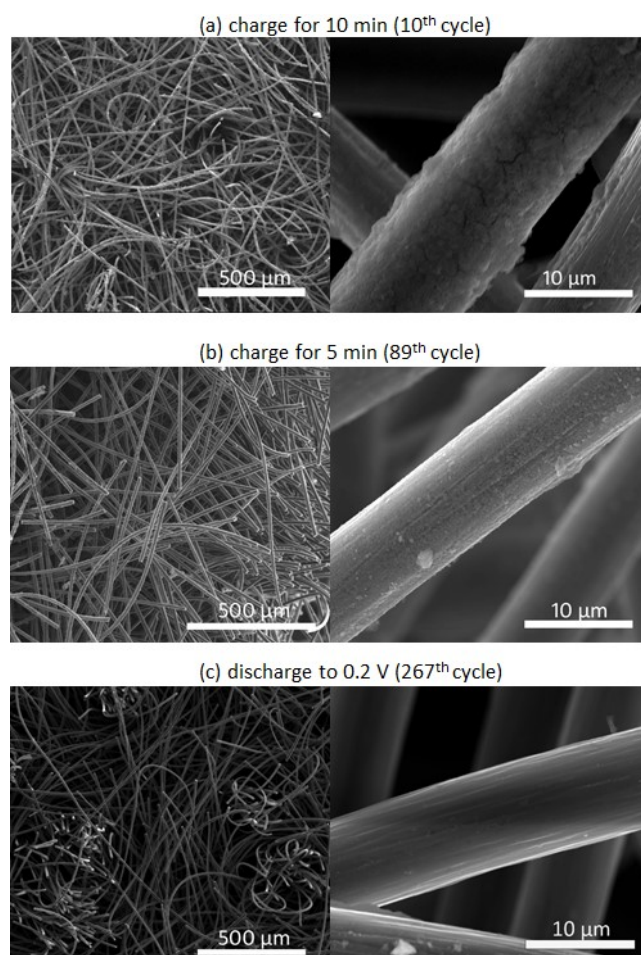

Fig. S12. The SEM morphologies of carbon felt in  $\text{Fe}^{2+}$ -cit anolyte at different charge/discharge states in different charge-discharge cycles.

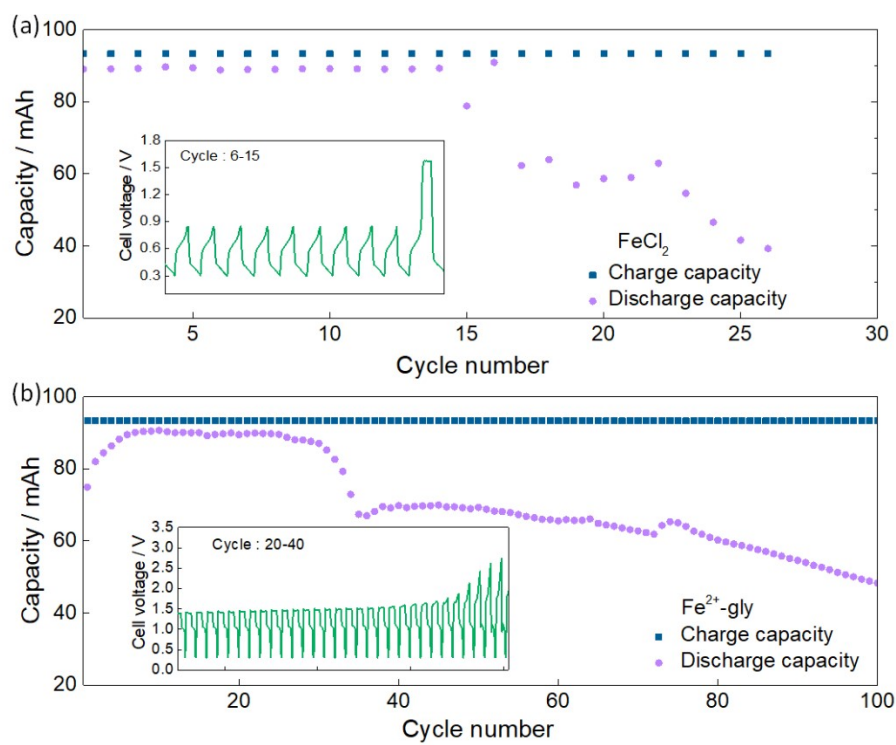

Fig. S13. The cycling performance and charge-discharge profile of the full cell adopting (a) FeCl<sub>2</sub> and (b) Fe<sup>2+</sup>-gly as anolyte at 20 mA cm<sup>-2</sup>.

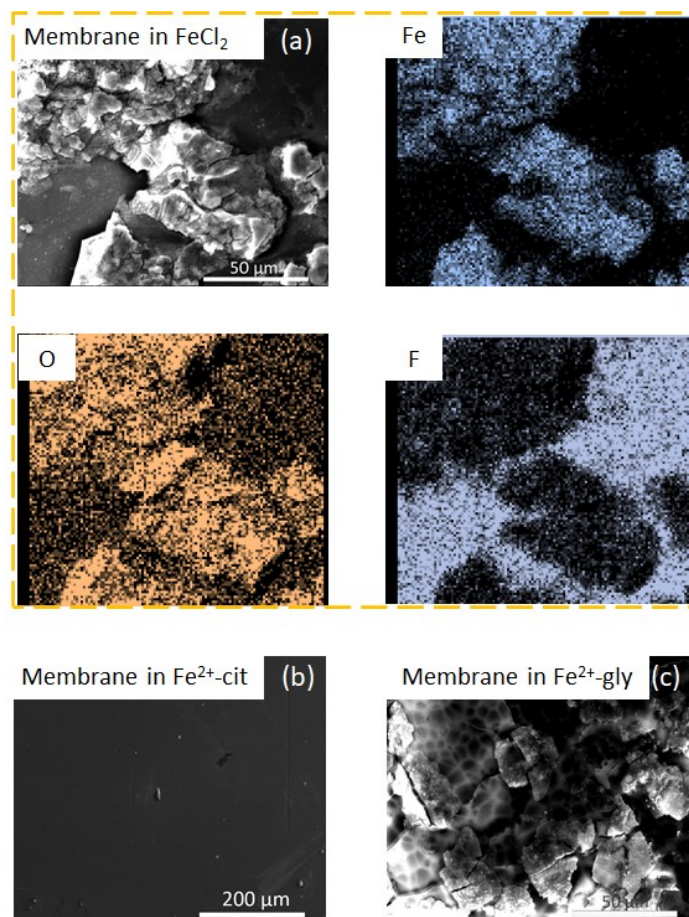

Fig. S14. The membrane morphology of the negative side cycled in different anolytes.

Note: the membranes in both  $\text{FeCl}_2$  and  $\text{Fe}^{2+}\text{-gly}$  anolytes were contaminated by iron oxides, whereas in  $\text{Fe}^{2+}\text{-cit}$  the membrane was uncontaminated.

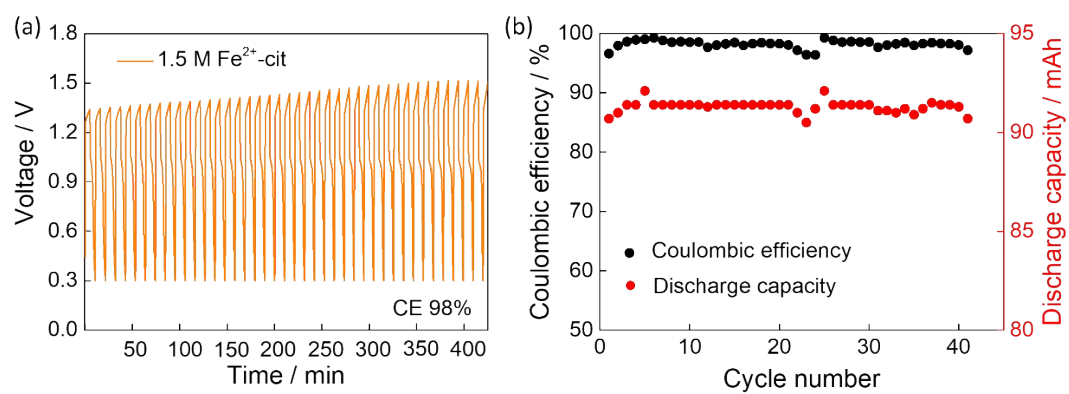

Fig. S15 The charge-discharge profiles and cycling performance of the flow cell adopting 1.5 M Fe<sup>2+</sup>-cit.

Table S1. Diffusion constants obtained by Levich plot

| Composition                           | Diffusion constant / $\text{cm}^2 \text{s}^{-1}$ |
|---------------------------------------|--------------------------------------------------|
| 10 mM $\text{FeCl}_2$                 | $2.3 \times 10^{-8}$                             |
| 10 mM $\text{FeCl}_2$ + 10 mM citrate | $5.2 \times 10^{-8}$                             |
| 10 mM $\text{FeCl}_2$ + 10 mM glycine | $3.7 \times 10^{-8}$                             |

Table S2. Comparison with other all-iron RFBs

| Raw material                        | FeCl <sub>2</sub> /FeCl <sub>2</sub> +Ch Cl+EG [22] | Fe <sub>3</sub> O <sub>4</sub> /Fe(CN) <sub>6</sub> <sup>4-</sup> [23] | Fe(acac) <sub>3</sub> / Fe <sup>2+</sup> [24] | Fc1N112-TFSI / Fe(acac) <sub>3</sub> [25] | Fe(DIPSO) / Fe(CN) <sub>6</sub> <sup>4-</sup> [26] | [Fe(TEOA)OH] <sup>-</sup> / Fe(CN) <sub>6</sub> <sup>4-</sup> [34] | [Fe(cit) <sub>2</sub> ] <sup>6-</sup> / Fe <sup>2+</sup> |
|-------------------------------------|-----------------------------------------------------|------------------------------------------------------------------------|-----------------------------------------------|-------------------------------------------|----------------------------------------------------|--------------------------------------------------------------------|----------------------------------------------------------|
| Cost / \$ kg <sup>-1</sup>          | 23                                                  | 22                                                                     | 652                                           | 535                                       | 200                                                | 42                                                                 | 19                                                       |
| Anode capacity / Ah L <sup>-1</sup> | 69.7                                                | 5.4                                                                    | 13.4                                          | 2.7                                       | 2.7                                                | 5.4                                                                | 80 <sup>**</sup>                                         |
| Cycle life                          | 16 <sup>*</sup>                                     | 150                                                                    | 100                                           | 100                                       | 25                                                 | 110                                                                | 300                                                      |

Note \*: The data was obtained the charge-discharge cycles utilizing 0.5:1:4 FeCl<sub>2</sub>:ChCl:EG.

\*\* : The data was the available capacity corresponding to the [Fe(cit)<sub>2</sub>]<sup>6-</sup> maximum solubility of 1.5 M.
